# Supplementary material
Source: MDPI journal article supplement (https://www.mdpi.com/2673-9976/30/1/10)
Supplement: s1 [file s1 › blsf-2882204-supplementary.pdf]

**Table S1.** Computation of the crop benefit for each biochar application rate.

| <b>Application rate<br/>(%)</b> | <b>Mean productivity<br/>(t/ha)</b> | <b>Improvement (%)</b> | <b>Price received by<br/>farmers (€/t)</b> | <b>Crop income<br/>(€/ha)</b> |
|---------------------------------|-------------------------------------|------------------------|--------------------------------------------|-------------------------------|
| 2.5                             | 6.24                                | 41.0                   | 269.9                                      | 690.51                        |
| 5                               | 8.96                                | 58.9                   | 269.9                                      | 1424.38                       |
| 10                              | 9.44                                | 61.0                   | 269.9                                      | 1554.19                       |
